# Supplementary material for: Loddigesiinols G–J: α-Glucosidase Inhibitors from Dendrobium loddigesii
Source: PubMed Central journal article supplement (PMC6270667; doi:10.3390/molecules19068544), 2014-06-23
Supplement: molecules-19-08544-s001.pdf [file molecules-19-08544-s001.pdf]

# Supporting Information

Figure S1.  $^1\text{H-NMR}$  for loddigesinol G (1).

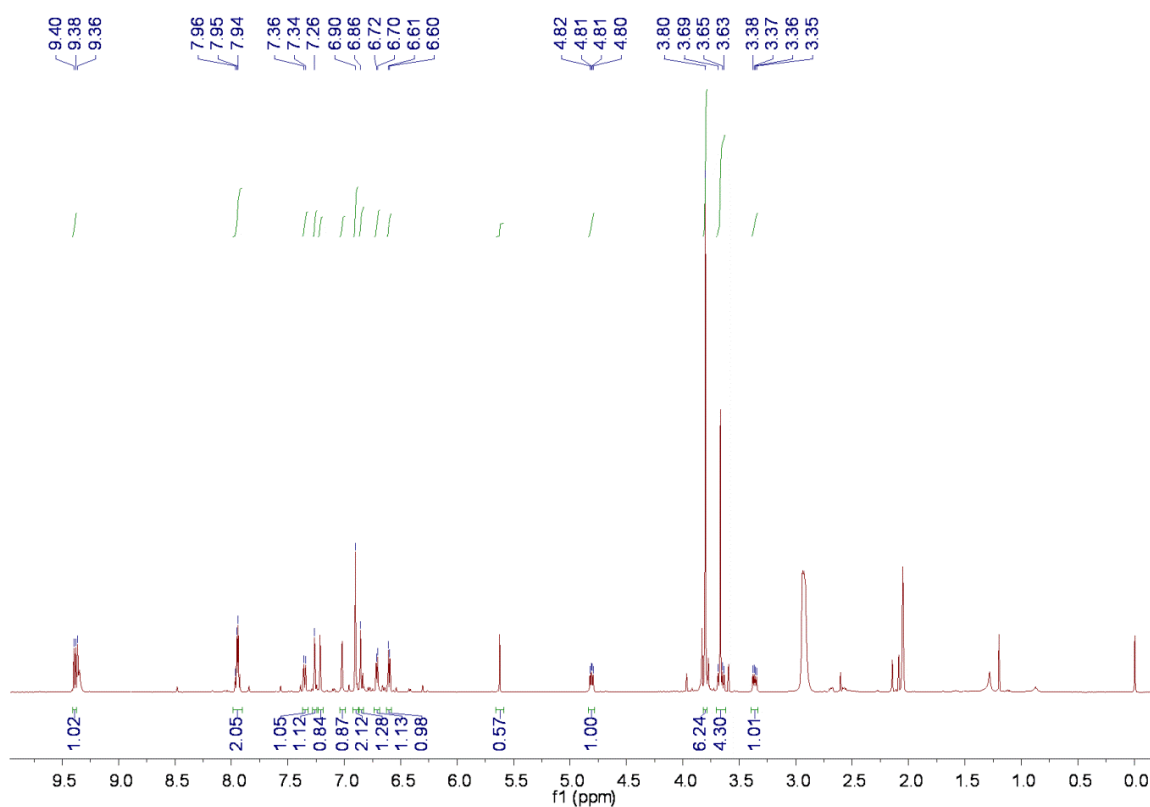

Figure S2.  $^{13}\text{C-NMR}$  for loddigesinol G (1).

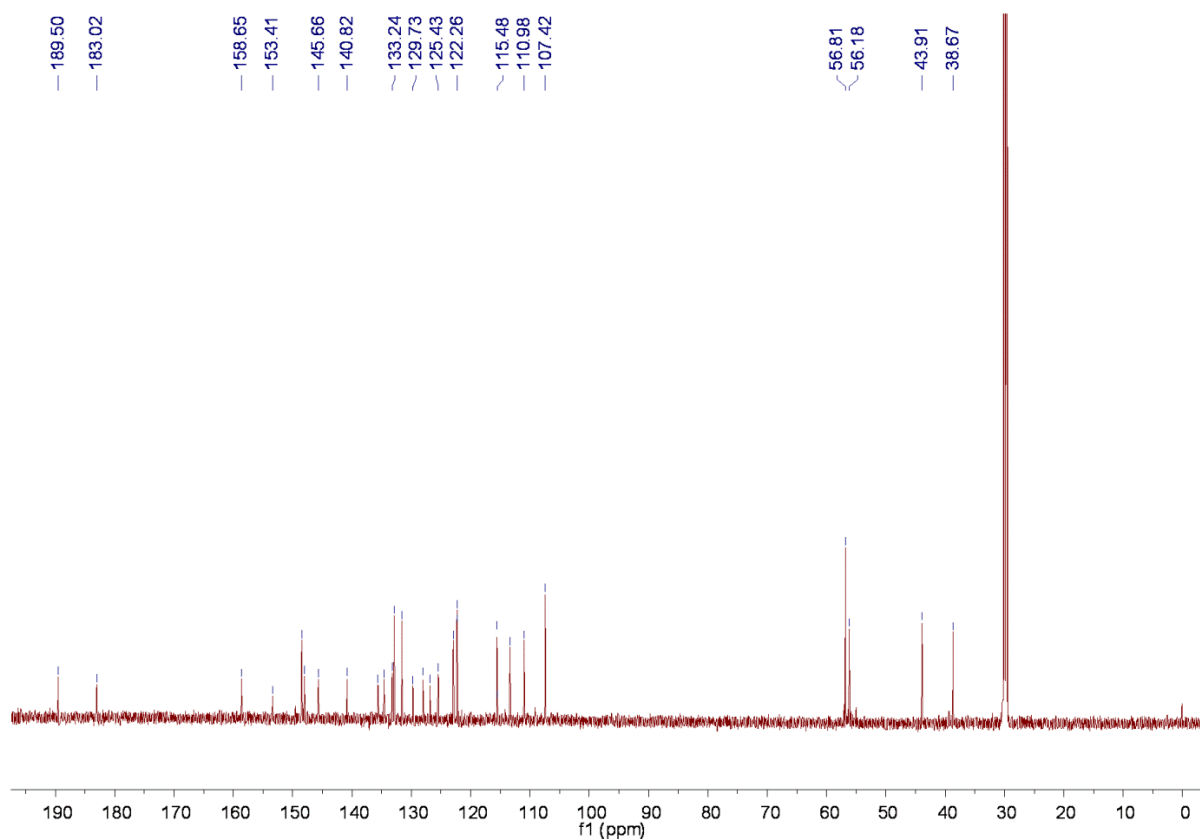

**Figure S3.**  $^1\text{H}$ - $^1\text{H}$  COSY for loddigiinol G (**1**).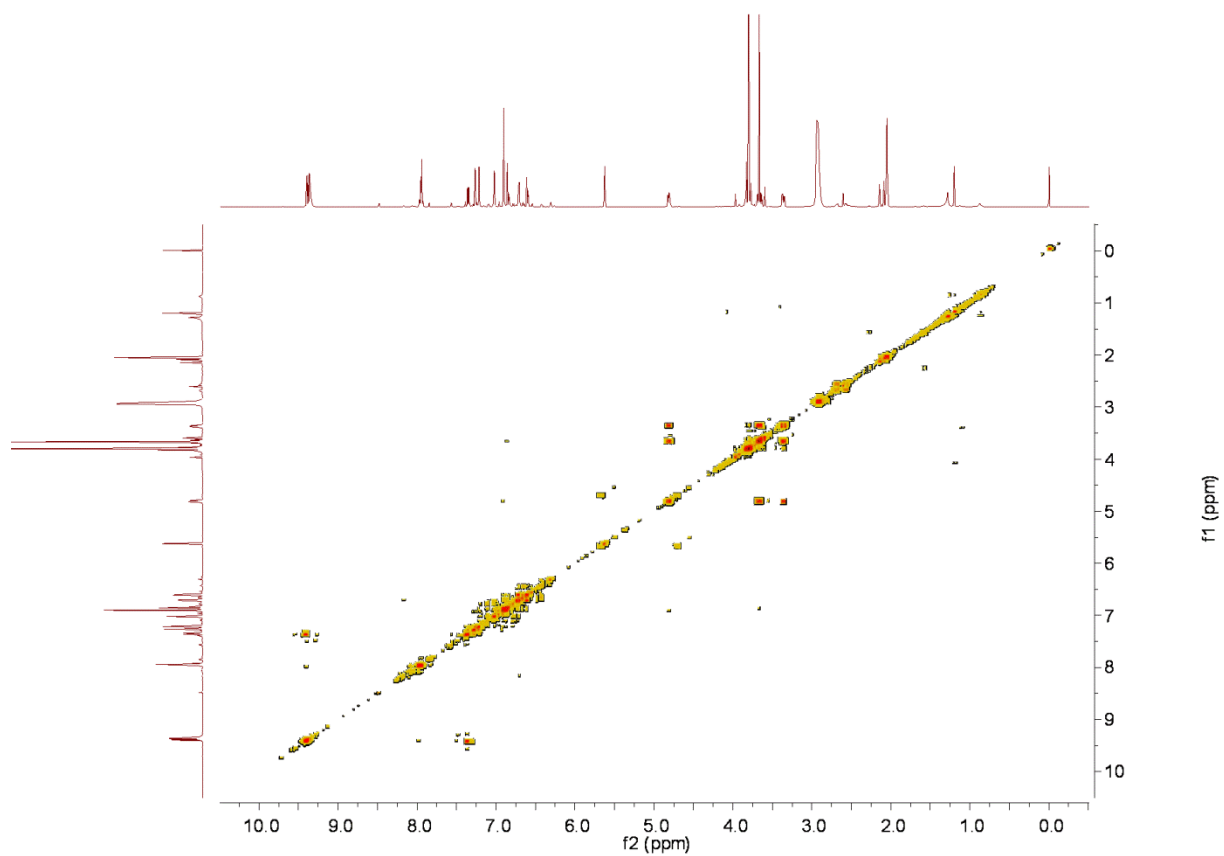**Figure S4.** HSQC for loddigiinol G (**1**).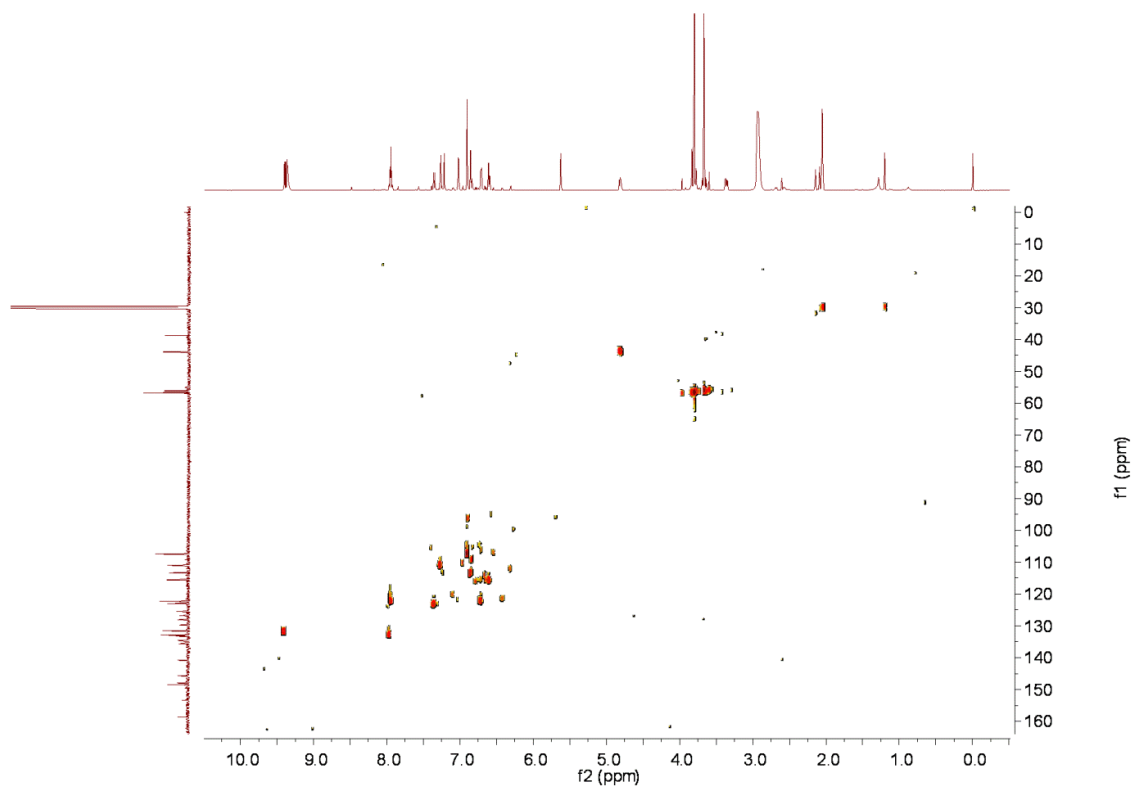

Figure S5. HMBC for loddigesinol G (1).

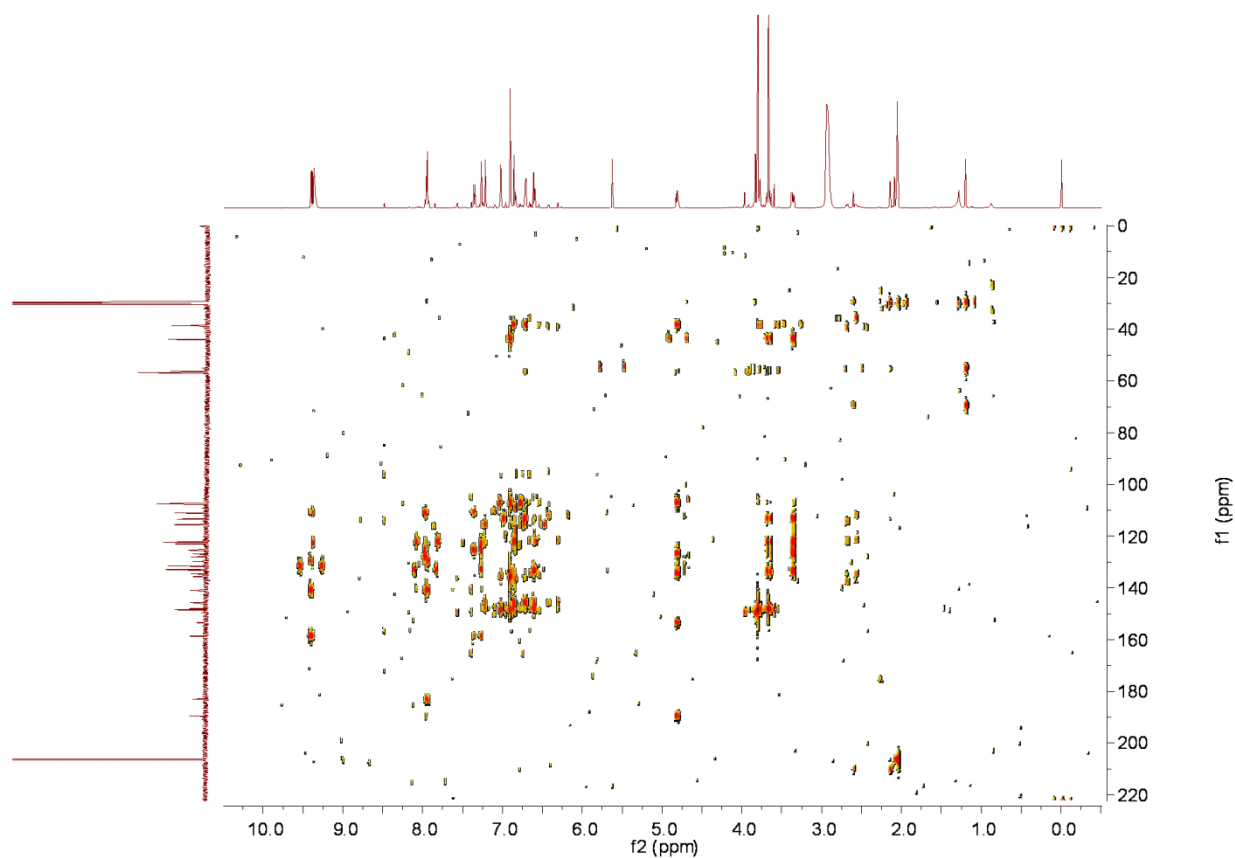Figure S6.  $^1\text{H}$ -NMR for loddigesinol H (2).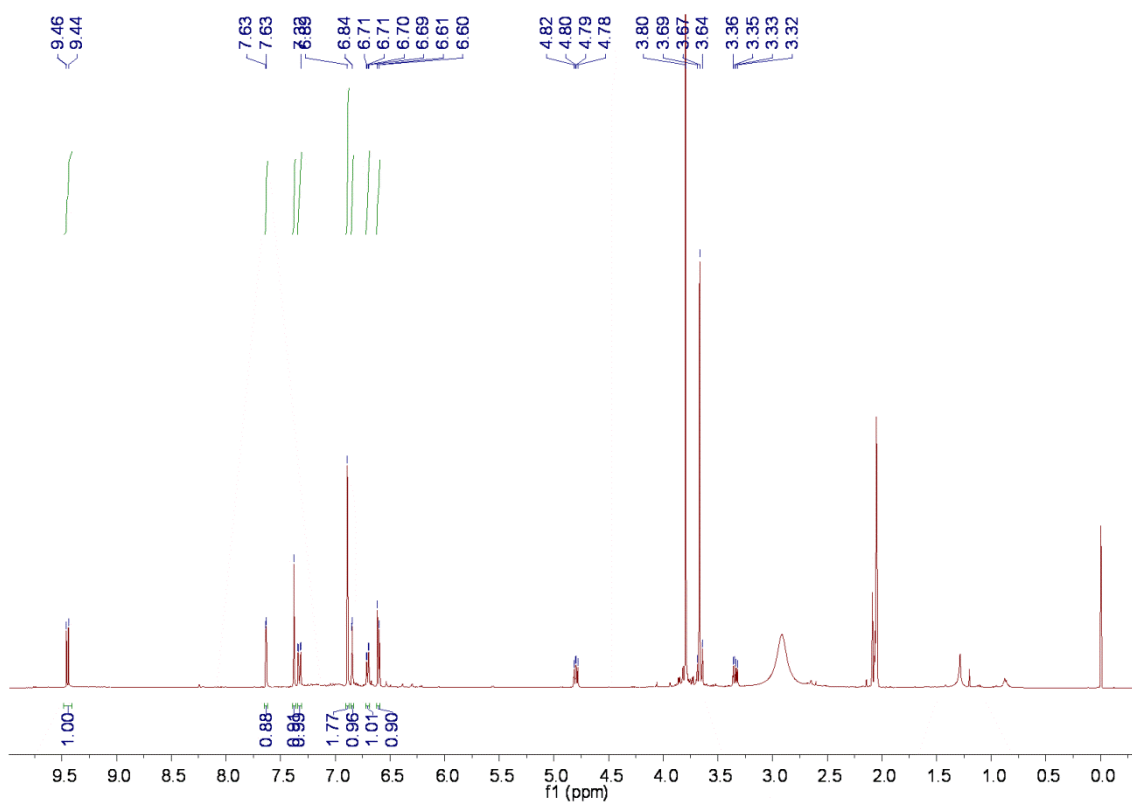

**Figure S7.**  $^{13}\text{C}$ -NMR for loddigesinol H (2).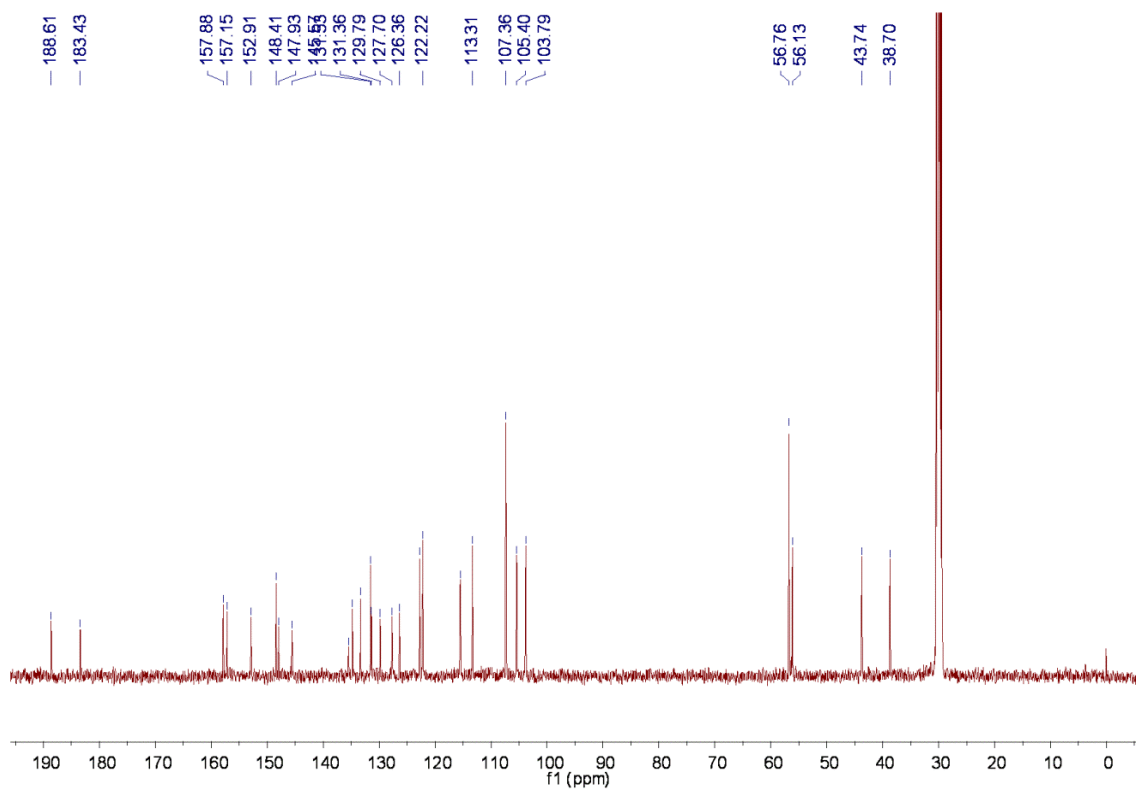**Figure S8.**  $^1\text{H}$ - $^1\text{H}$  COSY for loddigesinol H (2).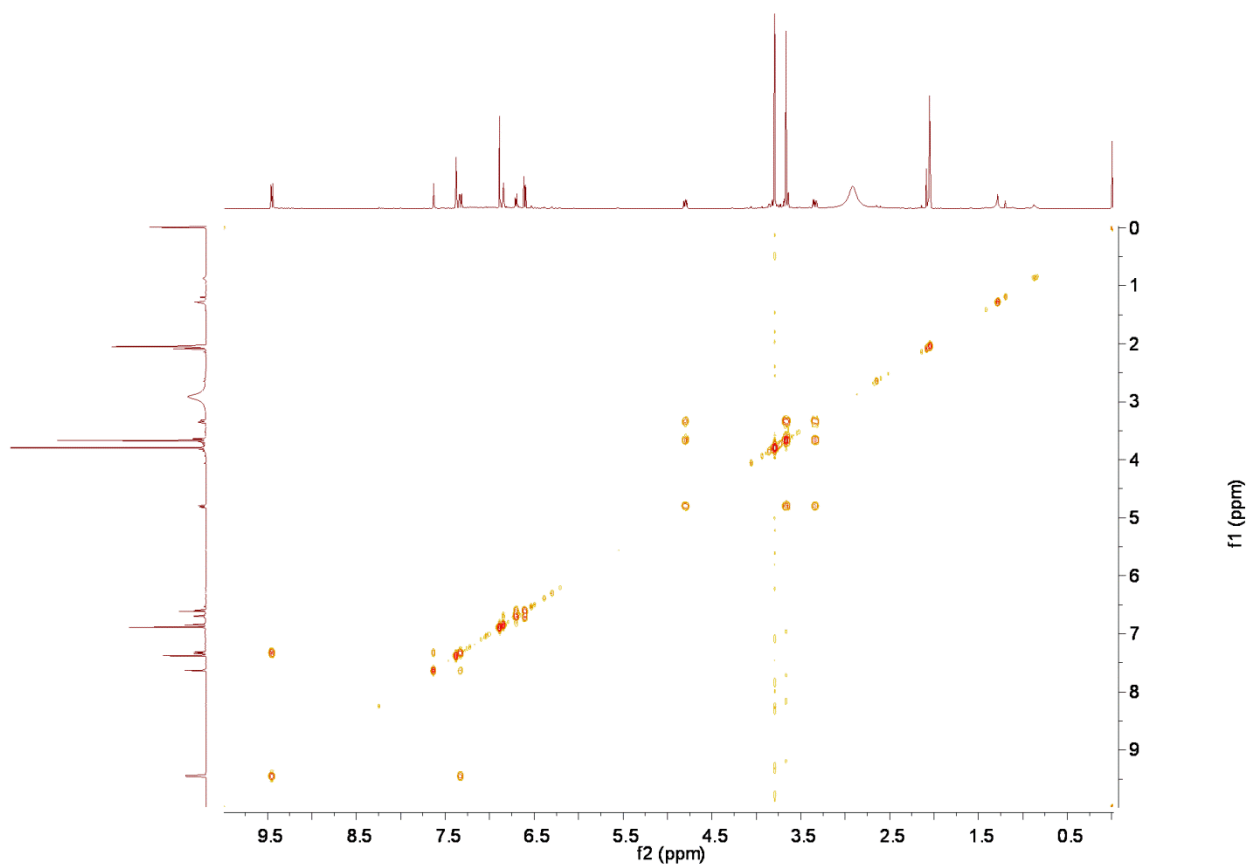

**Figure S9.** HSQC for loddigesiinol H (2).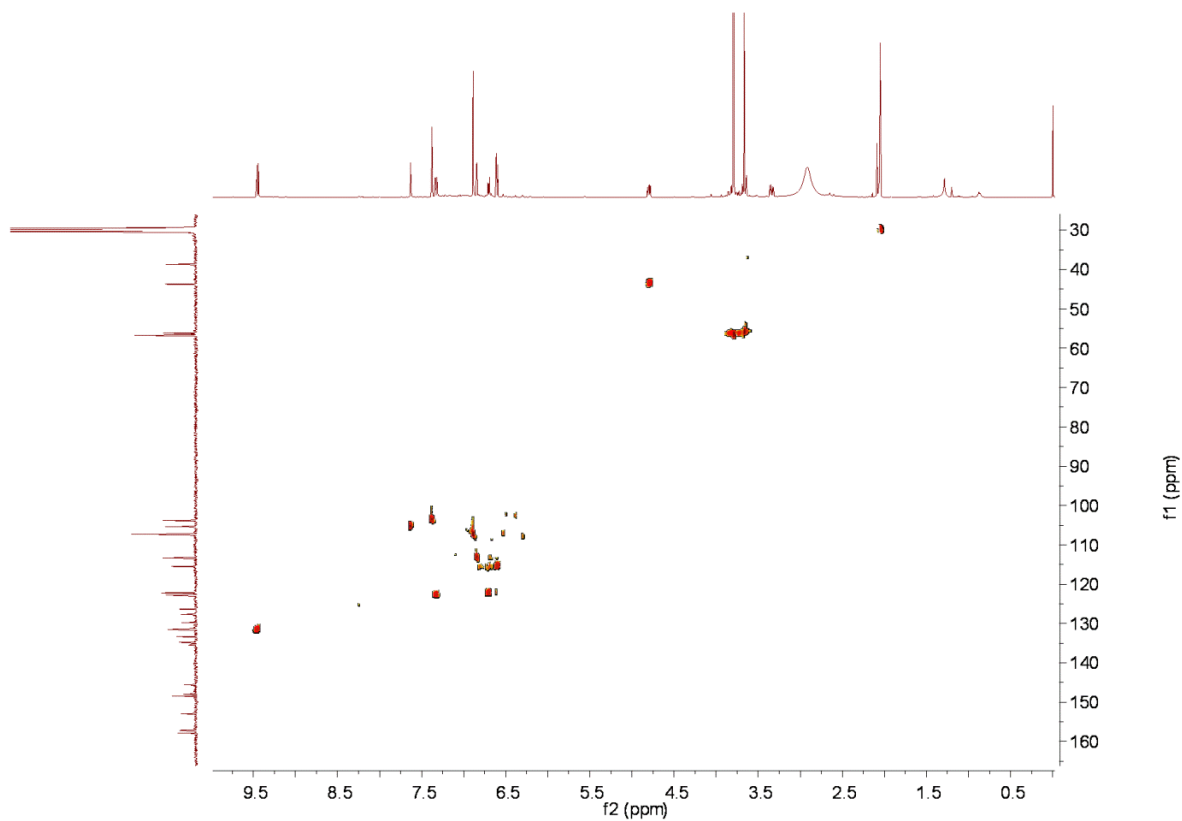**Figure S10.** HMBC for loddigesiinol H (2).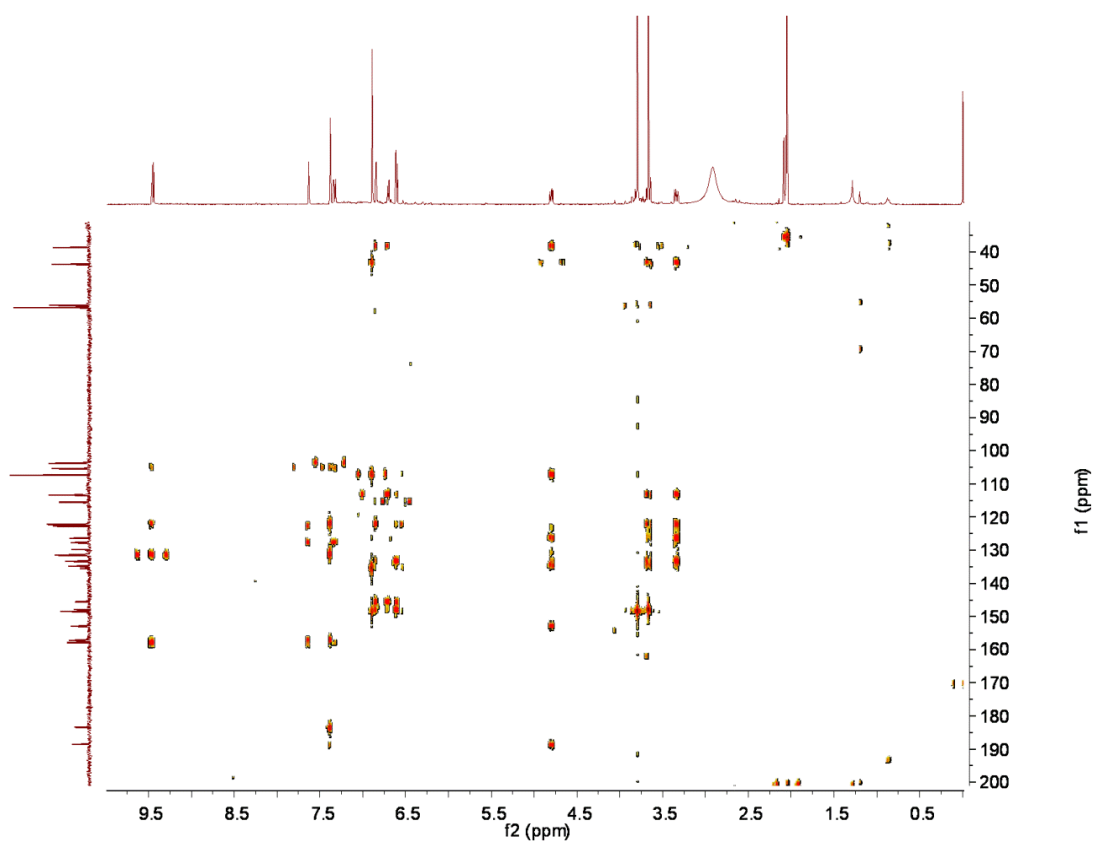

**Figure S11.** ECD spectrum for loddigesiinol H (2).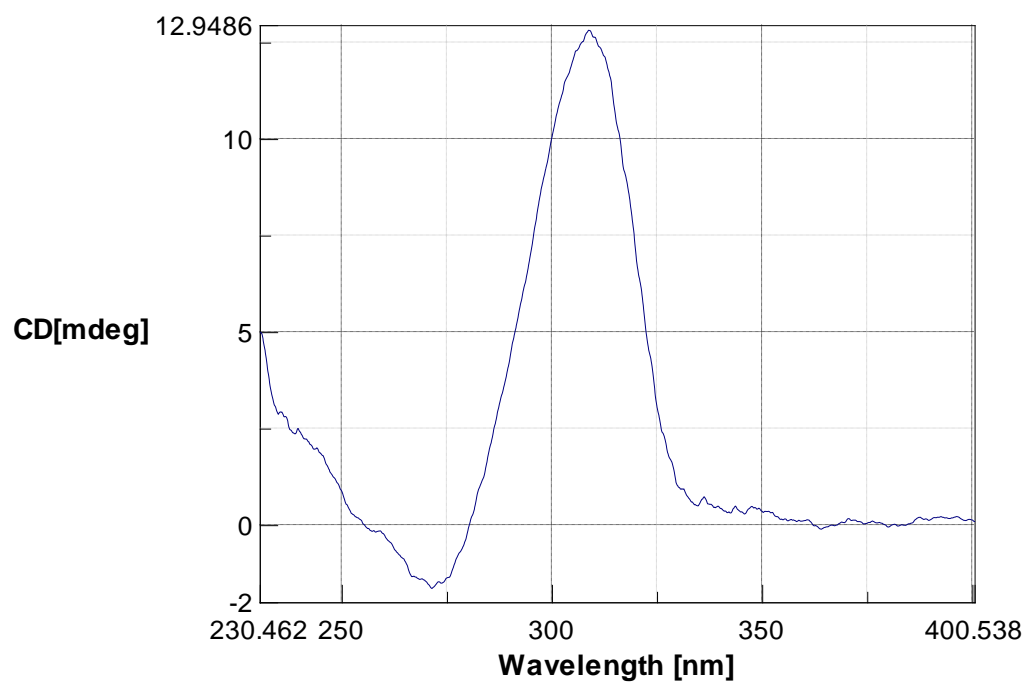**Figure S12.**  $^1\text{H-NMR}$  for loddigesiinol I (3).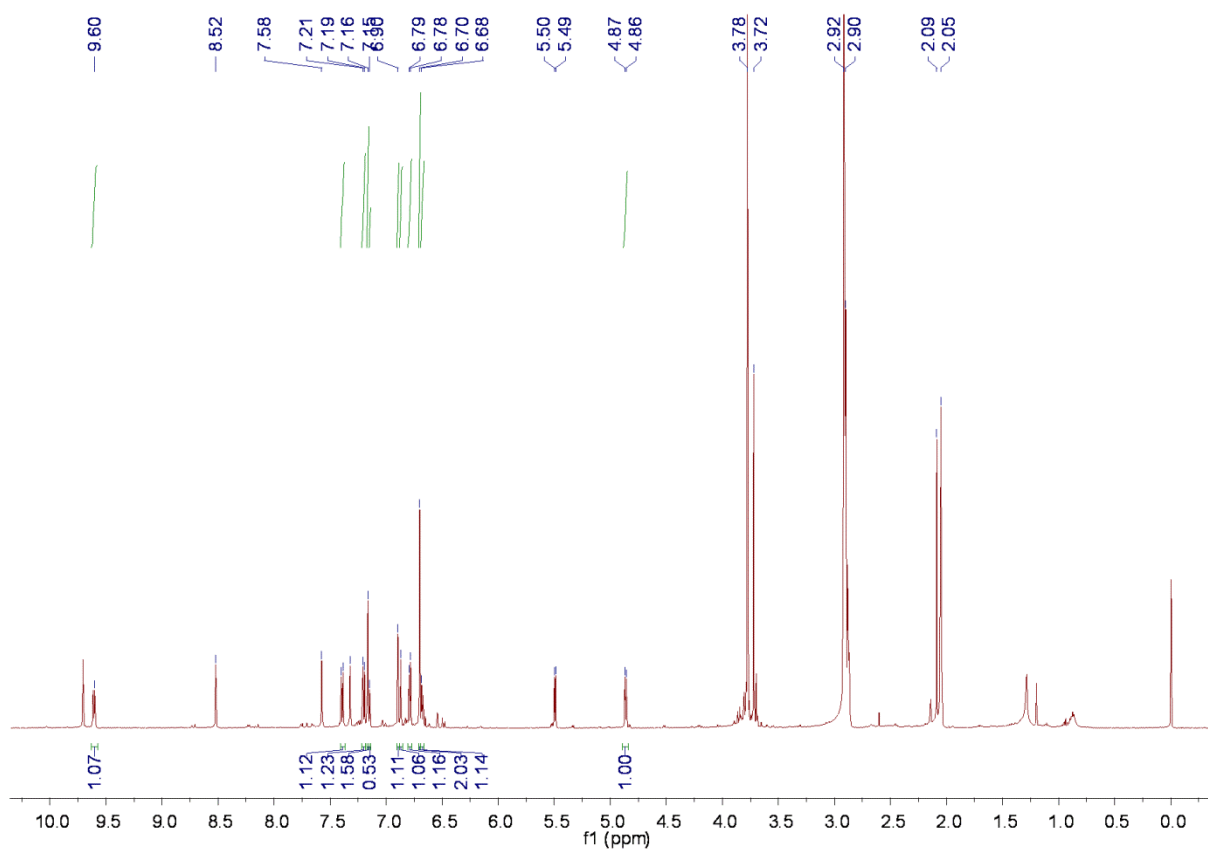

**Figure S13.**  $^{13}\text{C}$ -NMR for loddigesinol I (3).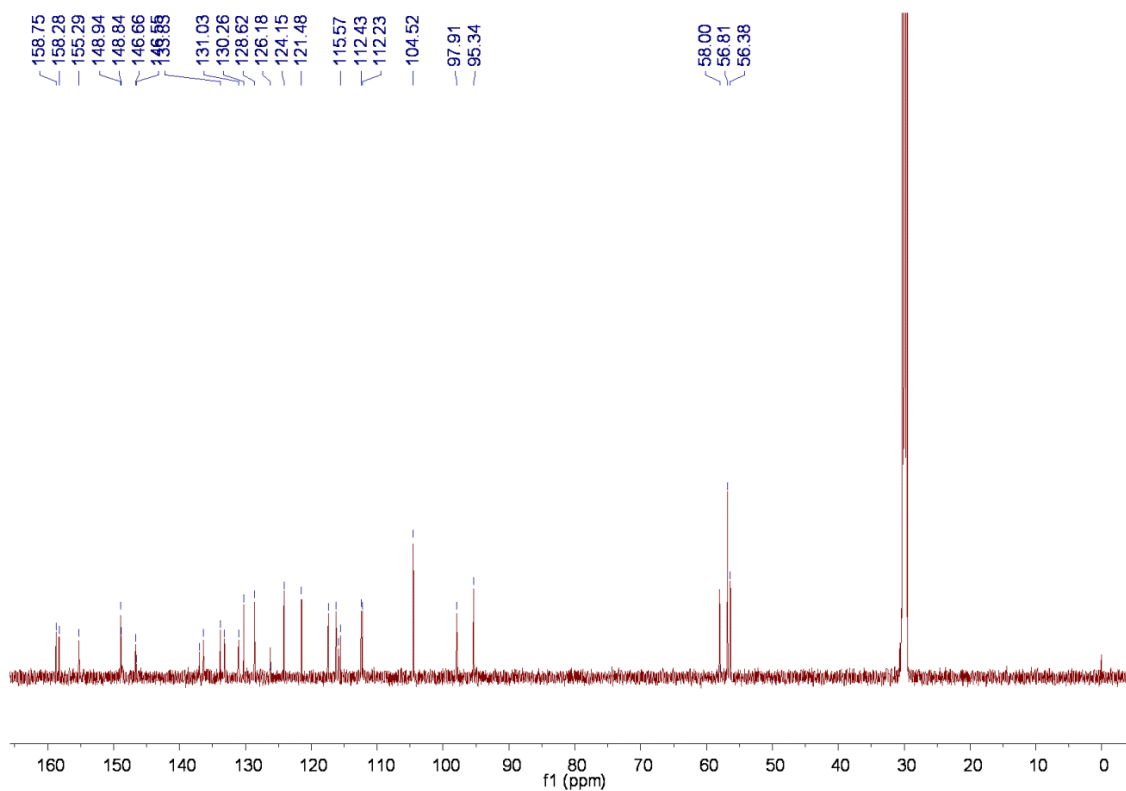**Figure S14.**  $^1\text{H}$ - $^1\text{H}$  COSY for loddigesinol I (3).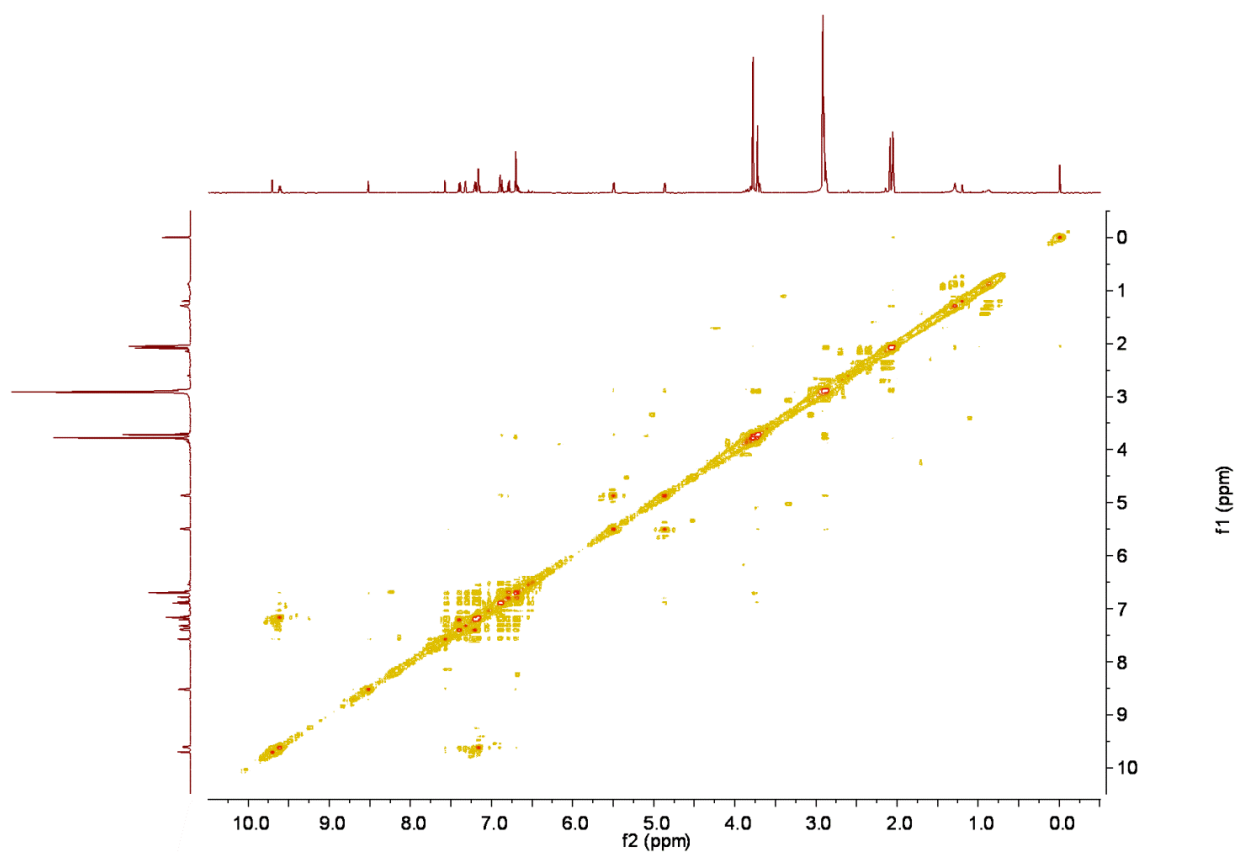

**Figure S15.** HSQC for loddigesiinol I (**3**).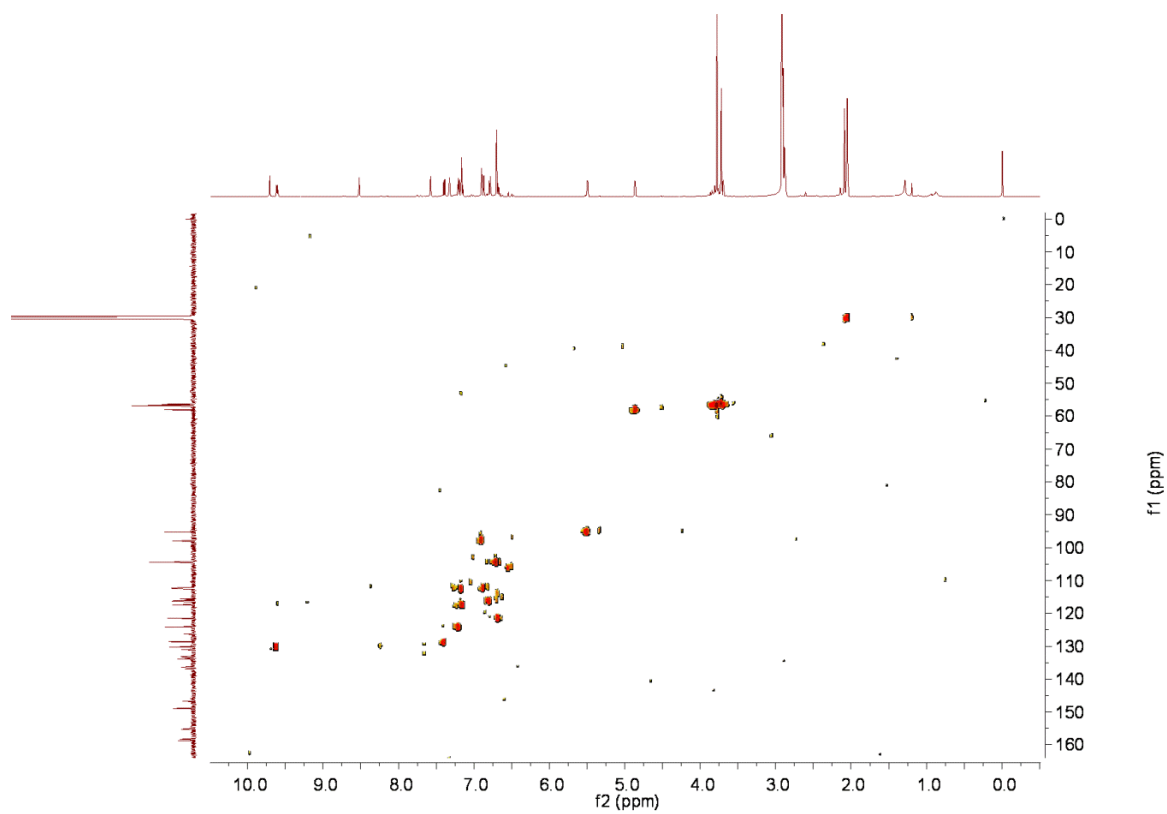**Figure S16.** HMBC for loddigesiinol I (**3**).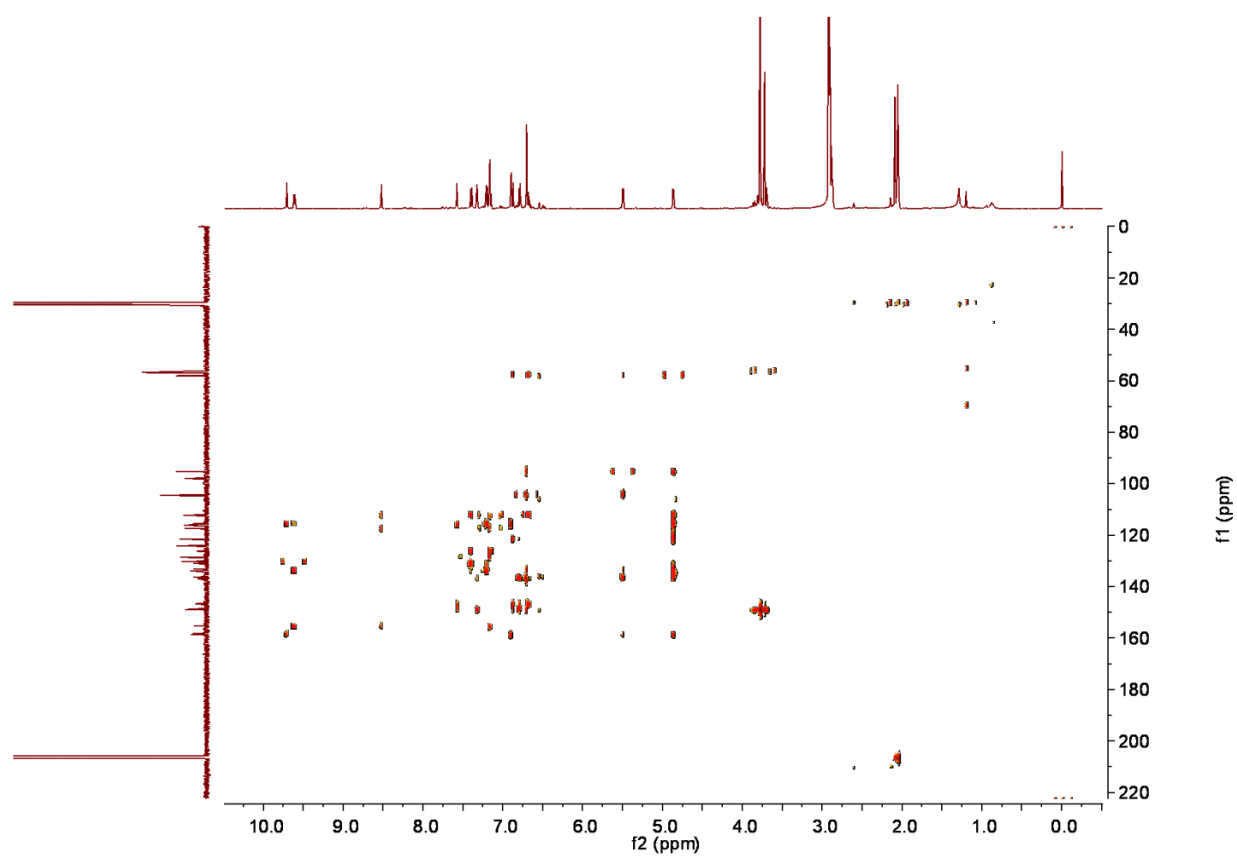



**Figure S17.** ROSEY for loddigesinol I (**3**).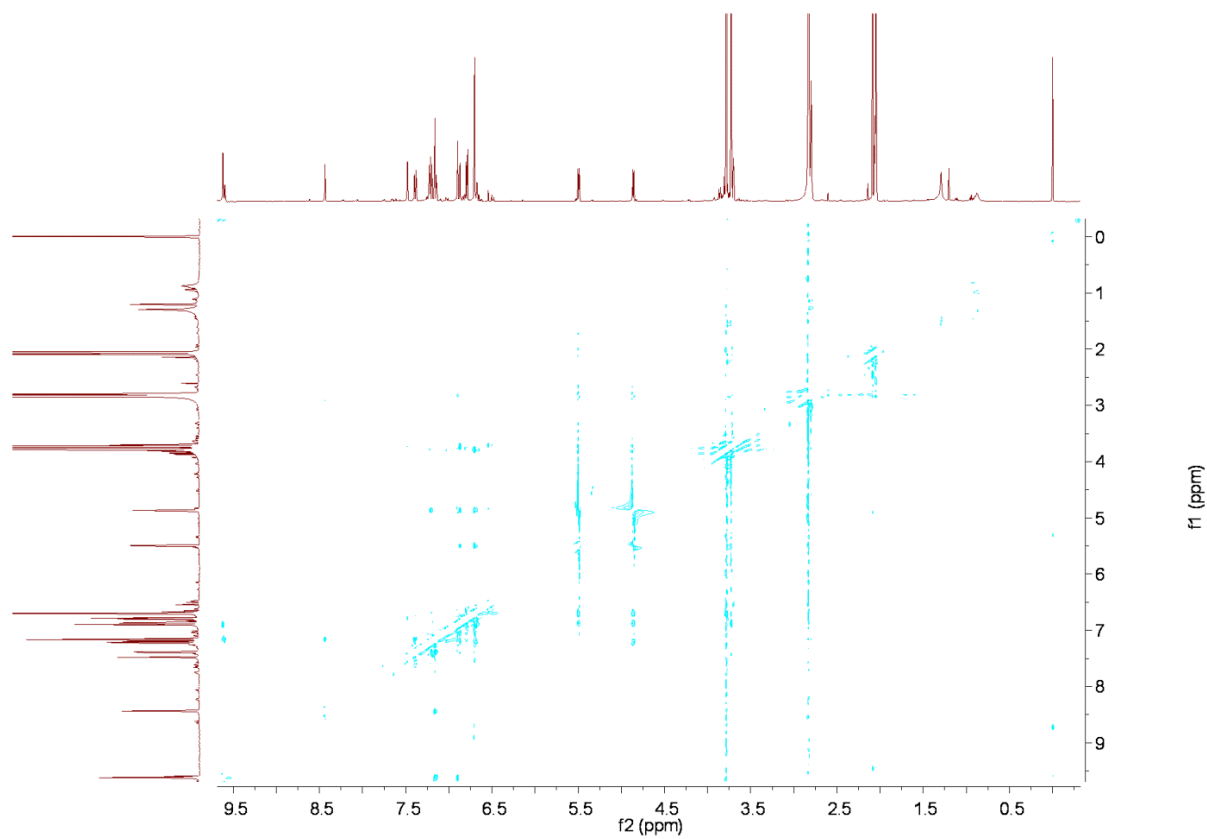**Figure S18.**  $^1\text{H-NMR}$  for loddigesinol J (**4**).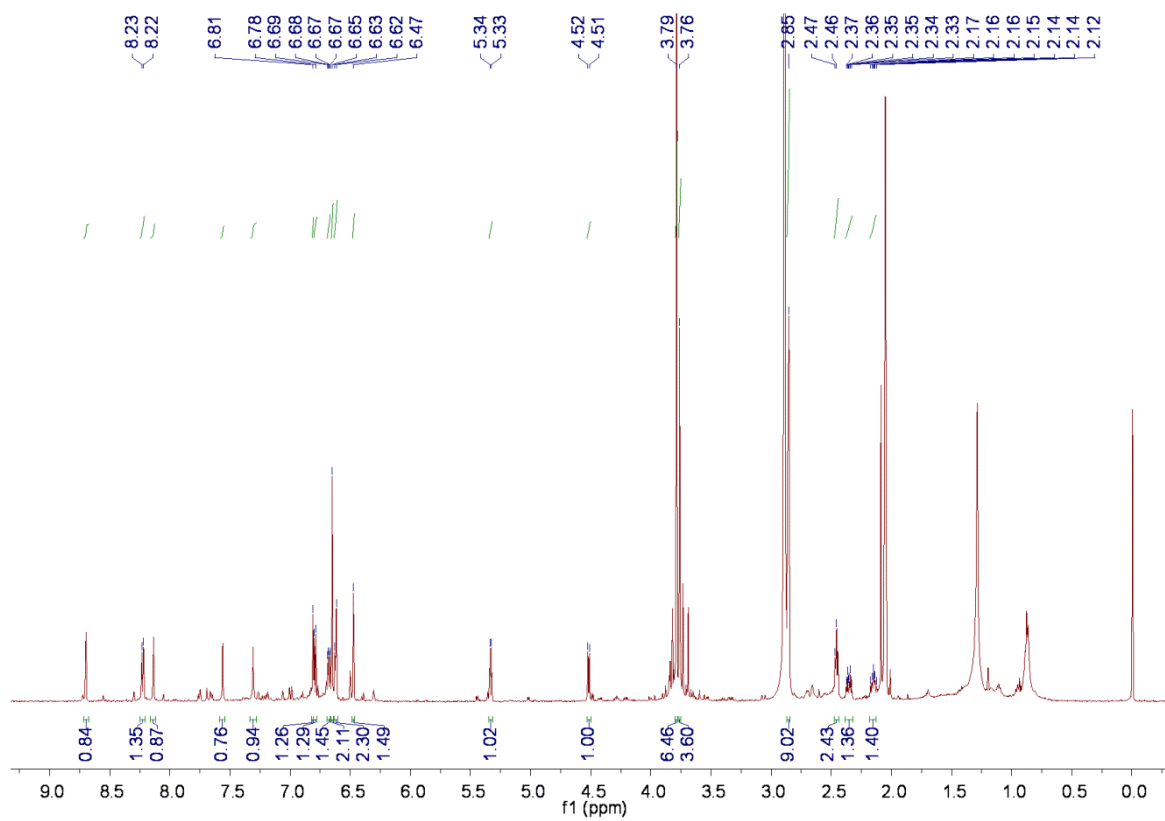

**Figure S19.**  $^{13}\text{C}$ -NMR for loddigesinol J (4).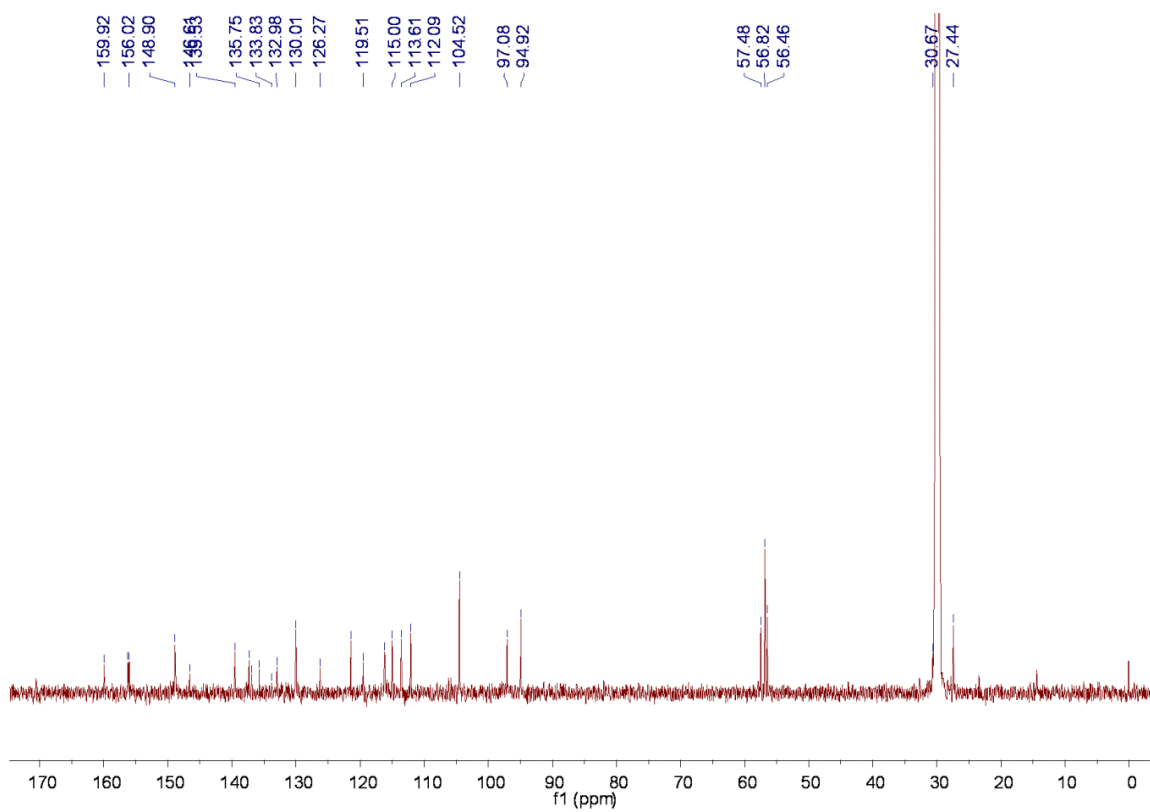**Figure S20.**  $^1\text{H}$ - $^1\text{H}$  COSY for loddigesinol J (4).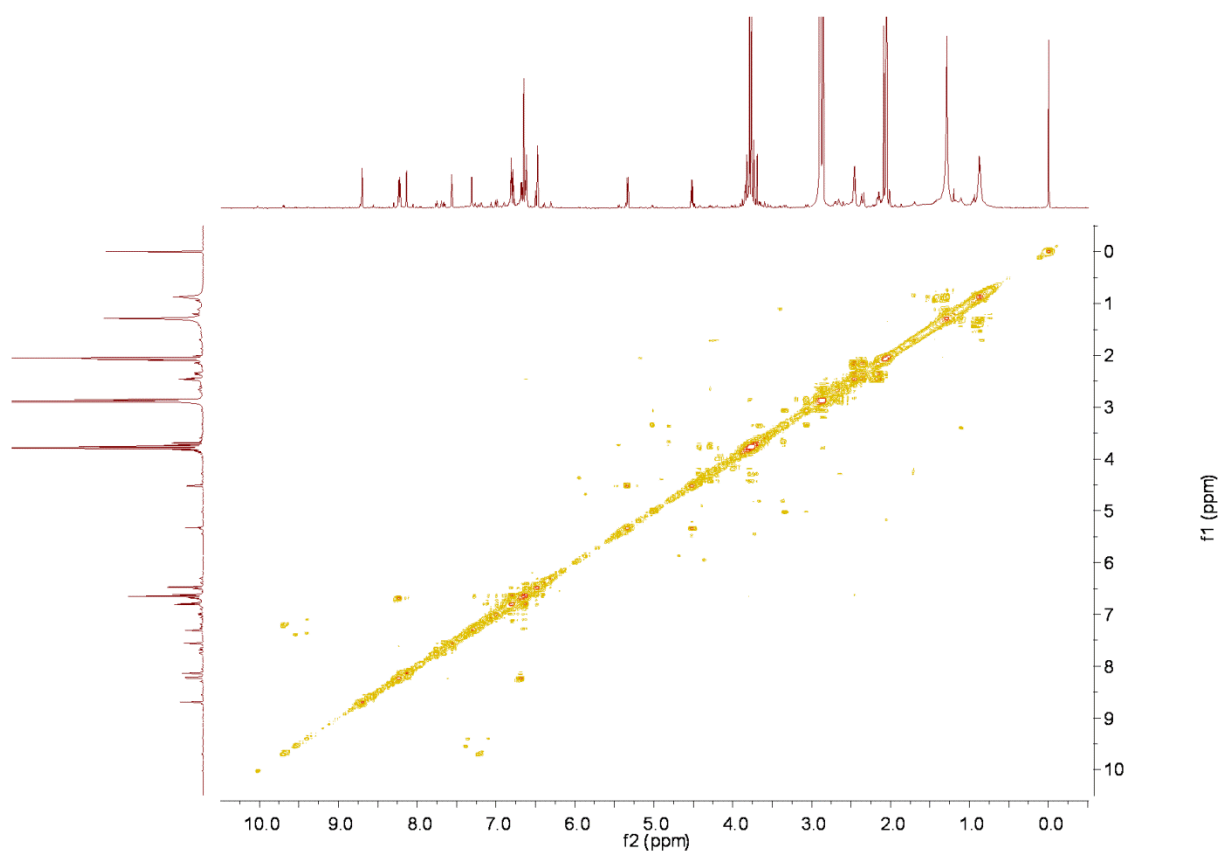

Figure S21. HSQC for loddigesiinol J (4).

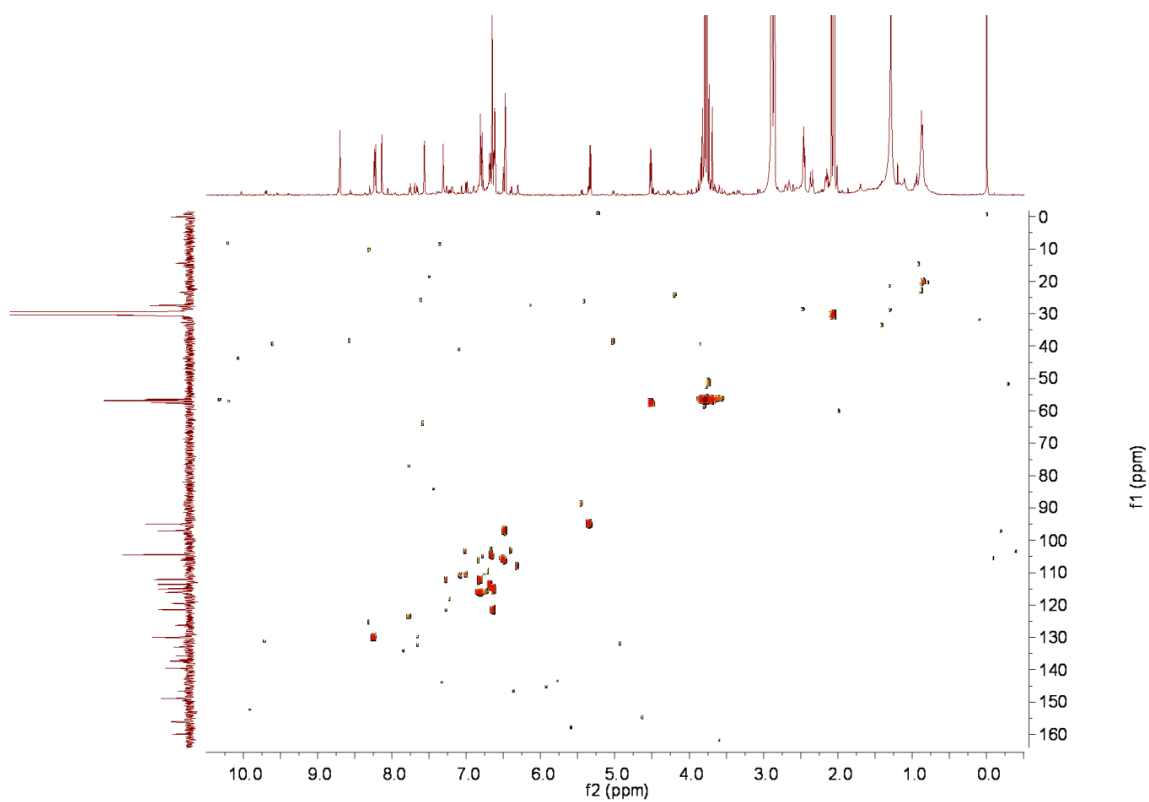

Figure S22. HMBC for loddigesiinol J (4).

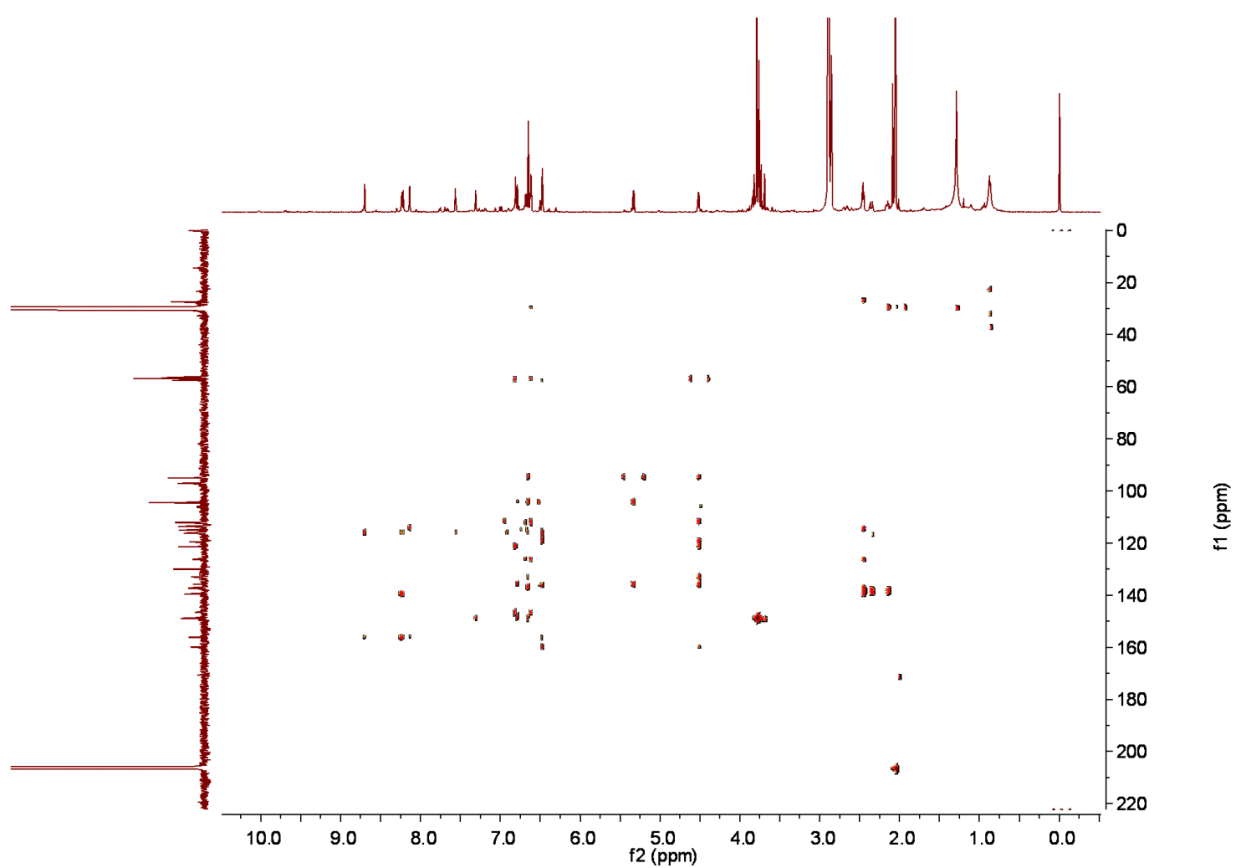

**Figure S23.** ECD spectrum for crepidatuol B (5).

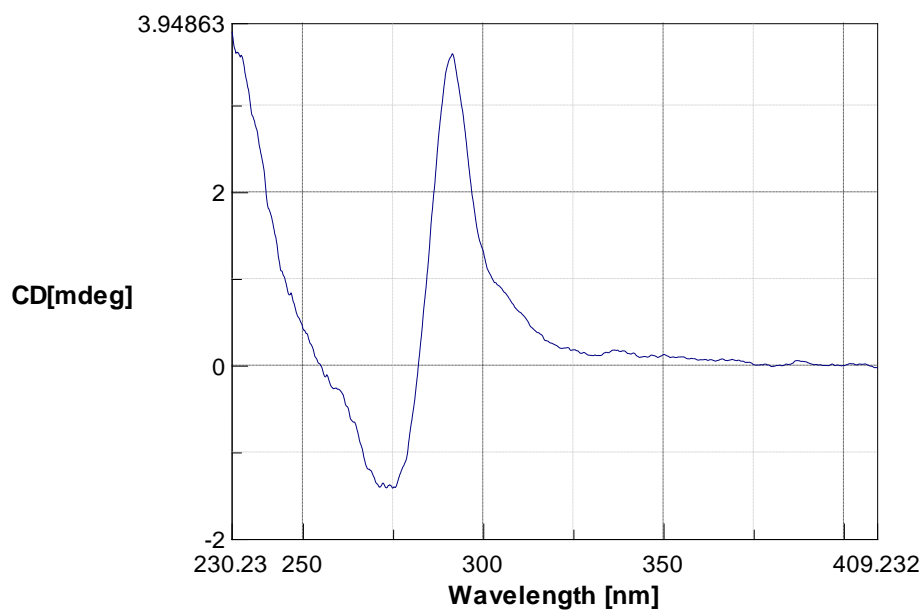

**Figure S24.**  $^1\text{H}$ - $^1\text{H}$  COSY and HMBC correlations for compounds 1–5.

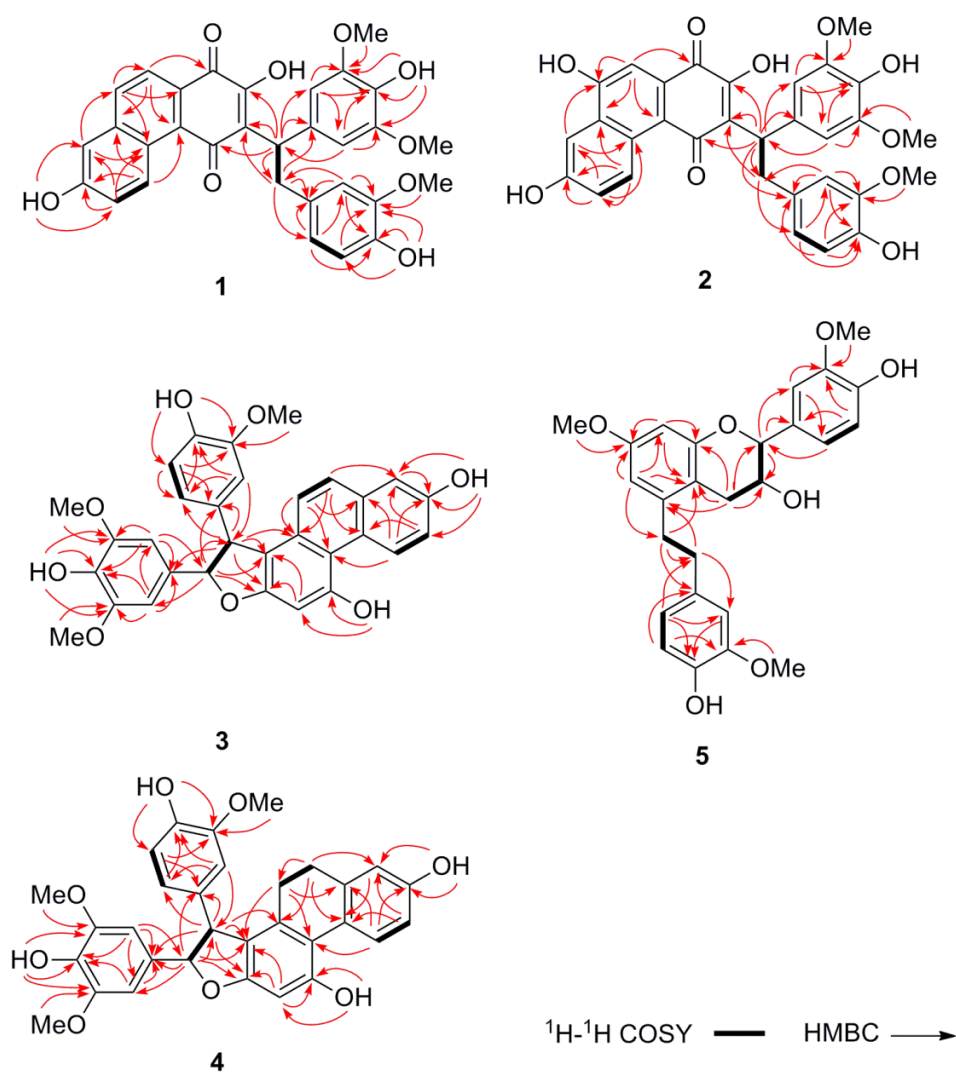

Table S1.  $^{13}\text{C}$  Data for Compounds 1–4.

| NO.                                | $1^a$           | $2^b$           | $3^a$           | $4^a$                 |
|------------------------------------|-----------------|-----------------|-----------------|-----------------------|
|                                    | $\delta$        | $\delta$        | $\delta$        | $\delta$              |
| 1                                  | 183.0, C        | 183.4, C        | 115.6, C        | 119.5, C              |
| 2                                  | 153.4, C        | 152.9, C        | 158.7, C        | 159.9, C              |
| 3                                  | 126.8, C        | 126.4, C        | 97.9, CH        | 97.1, CH              |
| 4                                  | 189.5, C        | 188.6, C        | 158.3, C        | 156.2, C              |
| 4a                                 | 140.8, C        | 122.1, C        | 133.8, C        | 133.8, C              |
| 4b                                 | 125.4, C        | 127.7, C        | 126.2, C        | 126.3, C              |
| 5                                  | 131.6, CH       | 131.5, CH       | 130.3, CH       | 130.0, CH             |
| 6                                  | 123, CH         | 122.8, CH       | 117.4, CH       | 113.6, CH             |
| 7                                  | 158.7, C        | 157.9, C        | 155.3, C        | 156.0, C              |
| 8                                  | 111, CH         | 105.4, CH       | 112.4, CH       | 115.0, CH             |
| 8a                                 | 129.7, C        | 131.4, C        | 115.8, C        | 139.5, C              |
| 9                                  | 132.9, CH       | 157.2, C        | 128.6, CH       | 30.2, CH <sub>2</sub> |
| 10                                 | 122.3, CH       | 103.8, CH       | 124.1, CH       | 27.5, CH <sub>2</sub> |
| 10a                                | 128.1, C        | 129.8, C        | 131.0, C        | 136.9, C              |
| 1''                                | 134.6, C        | 134.8, C        | 133.2, C        | 133.0, C              |
| 2''                                | 107.4, CH       | 107.4, CH       | 104.5, CH       | 104.5, CH             |
| 3''                                | 148.5, C        | 148.4, C        | 148.9, C        | 148.9, C              |
| 4''                                | 135.6, C        | 135.5, C        | 136.9, C        | 137.3, C              |
| 5''                                | overlap with 3' | overlap with 3' | overlap with 3' | overlap with 3'       |
| 6''                                | overlap with 2' | overlap with 2' | overlap with 2' | overlap with 2'       |
| a                                  | 133.2, C        | 133.3, C        | 136.4, C        | 135.8, C              |
| a'                                 | 113.4, CH       | 113.3, CH       | 112.2, CH       | 112.1, CH             |
| 3 <sup>1</sup> -CH <sub>3</sub> O  | 148.0, C        | 147.9, C        | 148.8, C        | 148.7, C              |
| 3 <sup>''</sup> -CH <sub>3</sub> O | 145.7, C        | 145.6, C        | 146.6, C        | 146.6, C              |
| 5 <sup>1</sup> -CH <sub>3</sub> O  | 115.6, CH       | 115.5, CH       | 116.2, CH       | 116.2, CH             |

The data were recorded at <sup>a</sup>150 MHz and <sup>b</sup>125 MHz; chemical shifts ( $\delta$ ) are in ppm.

Table S2. <sup>1</sup>H-NMR and HMBC Data for Compounds 1–4.

| 1 <sup>a</sup>        |                          | 2 <sup>b</sup>           |                          | 3 <sup>a</sup>                   |                        | 4 <sup>a</sup>                  |                      |                                     |
|-----------------------|--------------------------|--------------------------|--------------------------|----------------------------------|------------------------|---------------------------------|----------------------|-------------------------------------|
| No.                   | δ(J)                     | HMBC                     | δ(J)                     | HMBC                             | δ(J)                   | HMBC                            | δ(J)                 | HMBC                                |
| 3                     |                          |                          |                          |                                  | 6.9, s                 | C-1, 2                          | 6.47, s              | C-1, 2, 4                           |
| 5                     | 9.39, d (9.6)            | C-4a, 7, 8, 8a           | 9.45, d (9.5)            | C-6, 7, 8, 8a, 4a                | 9.61, d (9.0)          | C-8a, 4a, 7                     | 8.22, d (9.0)        | C-7, 8a                             |
| 6                     | 7.35, d (9.6)            | C-4b, 7, 8               | 7.33, dd (9.5, 3.0)      | C-4b, 7, 8                       | 7.15, dd<br>(9.0, 2.4) | C-4b, 7, 8                      | 6.67, dd (8.4, 1.8)  | C-4b, 8                             |
| 8                     | 7.26, brs                | C-4b, 7, 9               | 7.63, brs                | C-4b, 6, 9                       | 7.16, brs              | C-9, 7, 6                       | 6.62, brs            | C-4b, 9, 6                          |
| 9                     | 7.96, d (8.4)            | C-4a, 4b, 8, 10,<br>10a  |                          |                                  | 7.39, d (9.0)          | C-4b, 8, 10a, 4a                | 2.46, t (7.8)        | C-4b, 8, 10, 8a                     |
| 10 <sub>α</sub>       | 7.93, d (8.4)            | C-1, 4, 4b, 4a, 8a       | 7.38, s                  | C-1, 4, 4a, 8, 8a,<br>9, 10a     | 7.20, d (9.6)          | C-8a, 10a                       | 2.35, td (15.6, 7.8) | C-1, 9, 8a                          |
| 10 <sub>β</sub>       |                          |                          |                          |                                  |                        |                                 | 2.15, dt (15.0, 7.8) | C-1, 9, 8a                          |
| 2'                    | 6.90, s                  | C-3', 4', 5', 6', a      | 6.89, s                  | C-3', 4', 5', 6', a              | 6.70, s                | C-1', 6', 3', 4', a             | 6.65, s              | C-1', 6', 3', 4', a                 |
| 6'                    | 6.90, s                  | C-2', 3', 4', 5', a      | 6.89, s                  | C-2', 3', 4', 5', a              | 6.70, s                | C-1', 2', 3', 4', a             | 6.65, s              | C-1', 2', 5', 4', a                 |
| 2''                   | 6.85, s                  | C-1'', 3'', 4'', 6'', a' | 6.85, d (2.0)            | C-1'', 3'', 4'', 5'',<br>6'', a' | 6.87, s                | C-4'', 6'', a'                  | 6.81, s              | C-4'', 6'', a'                      |
| 5''                   | 6.60, d (7.8)            | C-1'', 3''               | 6.61, d (8.0)            | C-1'', 2'', 3'', 4'', 6''        | 6.79, d (8.4)          | C-1'', 3'', 6''                 | 6.79, d (7.8)        | C-1'', 3''                          |
| 6''                   | 6.71, d (7.8)            | C-2'', 4'', a'           | 6.70, dd (8.0, 2.0)      | C-2'', 4'', a'                   | 6.67, d (7.8)          | C-2'', 4'', a'                  | 6.62, d (7.8)        | C-2'', 4'', a'                      |
| a                     | 4.81, dd<br>(10.2, 6.6)  | C-2, 3, 4, 1', 2'/6', a' | 4.80, dd (10.0,<br>6.5)  | C-2, 3, 4, 1', 2', a'            | 5.49, d (6.6)          | C-2, 2'/6', 1'', a', 1          | 5.33, d (7.2)        | C-2, 1', 2'/6',<br>1'', a'          |
| a' <sub>α</sub>       | 3.36, dd<br>(13.8, 6.6)  | C-1', 1'', 2'', 6'', a   | 3.67, dd (13.5,<br>10.0) | C-3, 1'', 2'', 6'', a            | 4.86, d (6.6)          | C-2, 1', 1'', 6'', a,<br>10a, 1 | 4.52, d (6.6)        | C-1, 2, 1', 1'',<br>2''/6'', a, 10a |
| a' <sub>β</sub>       | 3.66, dd<br>(13.8, 10.2) | C-1', 1'', 2'', 6'', a   | 3.34, dd (13.5,<br>7.0)  | C-3, 1'', 2'', 6'', a            |                        |                                 |                      |                                     |
| 3'-CH <sub>3</sub> O  | 3.80, s                  | C-3'                     | 3.8, s                   | C-3'                             | 3.78, s                | C-3', 5'                        | 3.79, s              | C-3', 5'                            |
| 3''-CH <sub>3</sub> O | 3.67, s                  | C-3''                    | 3.67, s                  | C-3''                            | 3.72, s                | C-3''                           | 3.76, s              | C-3''                               |

Table S2. Cont.

| No.                  | <b>1<sup>a</sup></b> |        | <b>2<sup>b</sup></b> |      | <b>3<sup>a</sup></b> |                 | <b>4<sup>a</sup></b> |                 |
|----------------------|----------------------|--------|----------------------|------|----------------------|-----------------|----------------------|-----------------|
|                      | $\delta$ (J)         | HMBC   | $\delta$ (J)         | HMBC | $\delta$ (J)         | HMBC            | $\delta$ (J)         | HMBC            |
| 5'-CH <sub>3</sub> O | overlap with 3'      | C-5'   | overlap with 3'      | C-5' | overlap with 3'      | overlap with 3' | overlap with 3'      | overlap with 3' |
| 9-OH                 |                      |        | unobserved           |      |                      |                 |                      |                 |
| 2-OH                 | unobserved           |        | unobserved           |      |                      |                 |                      |                 |
| 7-OH                 | 9.36, brs            | C-6, 8 | unobserved           |      | 8.52, s              | C-7, 6, 8       | 8.70, s              | C-7, 8          |
| 4-OH                 |                      |        |                      |      | 9.7, s               | C-4, 3          | 8.13, s              | C-4, 3          |
| 4''-OH               | 7.21, brs            |        | unobserved           |      | 7.57, s              | C-3'', 5''      | 7.56, s              | C-3'', 5''      |
| 4'-OH                | 7.02, brs            |        | unobserved           |      | 7.32, s              | C-3', 5', 4'    | 7.31, s              | C-3', 5', 4'    |

The data were recorded at <sup>a</sup> 600 MHz and <sup>b</sup> 500 MHz; chemical shifts ( $\delta$ ) are in ppm, and coupling constants ( $J$ ) are in Hz.

**Table S3.** NMR Data of Compounds **5** (in C<sub>2</sub>D<sub>6</sub>CO).

| <b>5<sup>d</sup></b>             |                                  |                       |                              |
|----------------------------------|----------------------------------|-----------------------|------------------------------|
| <b>NO.</b>                       | <b><math>\delta_H</math> (J)</b> | <b>HMBC</b>           | <b><math>\delta_c</math></b> |
| 1                                |                                  |                       | 82.9, CH                     |
| 2                                | 4.60, d (8.0)                    | C-3, 1', 2', 6', 4    | 68.6, CH                     |
| 3                                | 4.05, m                          |                       | 31.8, CH <sub>2</sub>        |
| 4 <sub><math>\alpha</math></sub> | 3.00, dd (15.6, 5.2)             | C-3, 2, 5, 9, 10      |                              |
| 4 <sub><math>\beta</math></sub>  | 2.66, dd (15.6, 8.8)             | C-3, 2, 5, 9, 10      | 143.1, C                     |
| 5                                |                                  |                       | 109.2, CH                    |
| 6                                | 6.42, d (2.4)                    | C-7, 8, a', 10        | 159.9, C                     |
| 7                                |                                  |                       | 99.9, CH                     |
| 8                                | 6.27, d (2.4)                    | C-9, 7, 6             | 156.5, C                     |
| 9                                |                                  |                       | 112.5, C                     |
| 10                               |                                  |                       | 131.8, C                     |
| 1'                               |                                  |                       | 111.9, CH                    |
| 2'                               | 7.04, s                          | C-2, 3', 6'           | 147.5, C                     |
| 3'                               |                                  |                       | 143.1, C                     |
| 4'                               |                                  |                       | 115.6, CH                    |
| 5'                               | 6.82, d (8.0)                    | C-1', 3'              | 121.5, CH                    |
| 6'                               | 6.89, d (8.0)                    | C-2, 2', 3'           | 134.1, C                     |
| 1''                              |                                  |                       | 113.1, CH                    |
| 2''                              | 6.83, s                          | C4'', 6'', a          | 148.2, C                     |
| 3''                              |                                  |                       | 145.7, C                     |
| 4''                              |                                  |                       | 115.7, CH                    |
| 5''                              | 6.74, d (8.0)                    | C-1'', 3''            | 121.7, CH                    |
| 6''                              | 6.69, d (8.0)                    | C-2'', a, 4''         | 37, CH <sub>2</sub>          |
| a                                | 2.81, m                          | C-5, 1'', 6'', 10, a' | 36.1, CH <sub>2</sub>        |
| a'                               | 2.81, m                          | C-5, 1'', 6'', 10, a' | 56.4, CH <sub>3</sub>        |
| 3'-CH <sub>3</sub> O             | 3.85, s                          | C-3'                  | 56.3, CH <sub>3</sub>        |
| 3''-CH <sub>3</sub> O            | 3.81, s                          | C-3''                 | 55.5, CH <sub>3</sub>        |
| 7-CH <sub>3</sub> O              | 3.72, s                          | C-7                   |                              |
| 3-OH                             | 4.00, brs                        |                       |                              |
| 4'-OH                            | 7.60, brs                        |                       |                              |
| 4''                              | 7.31, brs                        |                       |                              |

The data were recorded at <sup>d</sup> 400 MHz (<sup>1</sup>H-NMR) and 100 MHz (<sup>13</sup>C-NMR); chemical shifts ( $\delta$ ) are in ppm and coupling constants ( $J$ ) are in Hz.
